# Supplementary material
Source: ML conference proceedings conference paper supplement (https://proceedings.neurips.cc/paper_files/paper/2020/hash/228669109aa3ab1b4ec06b7722efb105-Abstract.html)
Supplement: Supplementary file [file 228669109aa3ab1b4ec06b7722efb105-Supplemental.pdf]

## APPENDIX: An Ode to an ODE

### 9 Proof of Lemma 4.1

*Proof.* Consider the following Euler-based discretization of the main (non-matrix) flow of the ODEtoODE:

$$\mathbf{x}_{\frac{i+1}{N}} = \mathbf{x}_{\frac{i}{N}} + \frac{1}{N} f \left( \mathbf{W}^\theta \left( \frac{i}{N} \right) \mathbf{x}_{\frac{i}{N}} \right), \quad (10)$$

where  $i = 0, 1, \dots, N-1$  and  $N \in \mathbb{N}_+$  is fixed (defines granularity of discretization). Denote:  $\mathbf{a}_i^N = \mathbf{x}_{\frac{i}{N}}$ ,  $\mathbf{c}_i^N = \mathbf{b}_{\frac{i}{N}}$ ,  $\mathbf{V}_i^N = \mathbf{W}^\theta \left( \frac{i}{N} \right)$  and  $\mathbf{z}_{i+1}^N = \mathbf{V}_{i+1}^{N,\theta} \mathbf{a}_i^N + \mathbf{c}_{i+1}^N$ . We obtain the following discrete dynamical system:

$$\mathbf{a}_{i+1}^N = \mathbf{a}_i^N + \frac{1}{N} f(\mathbf{z}_{i+1}^N), \quad (11)$$

for  $i = 0, 1, \dots, N-1$ .

Let  $\mathcal{L} = \mathcal{L}(\mathbf{x}_1) = \mathcal{L}(\mathbf{a}_N^N)$  by the loss function. Our first goal is to compute  $\frac{\partial \mathcal{L}}{\partial \mathbf{a}_i^N}$  for  $i = 0, \dots, N-1$ .

Using Equation 11, we get:

$$\begin{aligned} \frac{\partial \mathcal{L}}{\partial \mathbf{a}_i^N} &= \frac{\partial \mathbf{a}_{i+1}^N}{\partial \mathbf{a}_i^N} \frac{\partial \mathcal{L}}{\partial \mathbf{a}_{i+1}^N} = \left( \mathbf{I}_d + \frac{1}{N} \text{diag}(f'(\mathbf{z}_{i+1}^N)) \frac{\partial \mathbf{z}_{i+1}^N}{\partial \mathbf{a}_i^N} \right) \frac{\partial \mathcal{L}}{\partial \mathbf{a}_{i+1}^N} = \\ &= \left( \mathbf{I}_d + \frac{1}{N} \text{diag}(f'(\mathbf{z}_{i+1}^N)) \mathbf{V}_{i+1}^{N,\theta} \right) \frac{\partial \mathcal{L}}{\partial \mathbf{a}_{i+1}^N} \end{aligned} \quad (12)$$

Therefore we conclude that:

$$\frac{\partial \mathcal{L}}{\partial \mathbf{a}_i^N} = \left[ \prod_{r=i+1}^N \left( \mathbf{I}_d + \frac{1}{N} \text{diag}(f'(\mathbf{z}_r^N)) \mathbf{V}_r^{N,\theta} \right) \right] \frac{\partial \mathcal{L}}{\partial \mathbf{a}_N^N} \quad (13)$$

Note that for function  $f$  such that  $|f'(x)| = 1$  in its differentiable points we have:  $\text{diag}(f'(\mathbf{z}_r^N))$  is a diagonal matrix with nonzero entries taken from  $\{-1, +1\}$ , in particular  $D \in \mathcal{O}(d)$ , where  $\mathcal{O}(d)$  stands for the *orthogonal group*.

Define:  $\mathbf{G}_r^N = \text{diag}(f'(\mathbf{z}_r^N)) \mathbf{V}_r^{N,\theta}$ . Thus we have:

$$\frac{\partial \mathcal{L}}{\partial \mathbf{a}_i^N} = \left[ \prod_{r=i+1}^N \left( \mathbf{I}_d + \frac{1}{N} \mathbf{G}_r^N \right) \right] \frac{\partial \mathcal{L}}{\partial \mathbf{a}_N^N} \quad (14)$$

Note that the following is true:

$$\prod_{r=i+1}^N \left( \mathbf{I}_d + \frac{1}{N} \mathbf{G}_r^N \right) = \sum_{\{r_1, \dots, r_k\} \subseteq \{i+1, \dots, N\}} \frac{1}{N^k} \mathbf{G}_{r_1}^N \cdot \dots \cdot \mathbf{G}_{r_k}^N \quad (15)$$

Therefore we can conclude that:

$$\begin{aligned} \left\| \prod_{r=i+1}^N \left( \mathbf{I}_d + \frac{1}{N} \mathbf{G}_r^N \right) \right\|_2 &\leq \sum_{\{r_1, \dots, r_k\} \subseteq \{i+1, \dots, N\}} \frac{1}{N^k} \left\| \mathbf{G}_{r_1}^N \cdot \dots \cdot \mathbf{G}_{r_k}^N \right\|_2 \\ &= \sum_{k=0}^{N-i} \frac{1}{N^k} \binom{N-i}{k} = \sum_{k=0}^{N-i} \frac{(N-i-k+1) \cdot \dots \cdot (N-i)}{N^k k!} \leq \sum_{k=0}^{N-i} \frac{1}{k!} \leq e, \end{aligned} \quad (16)$$

where we used the fact that  $\mathcal{O}(d)$  is a group under matrix-multiplication and  $\|\mathbf{G}\|_2 = 1$  for every  $\mathbf{G} \in \mathcal{O}(d)$ . That proves inequality:  $\left\| \frac{\partial \mathcal{L}}{\partial \mathbf{a}_i^N} \right\|_2 \leq e \left\| \frac{\partial \mathcal{L}}{\partial \mathbf{a}_N^N} \right\|_2$ .

To prove the other inequality:  $\left\| \frac{\partial \mathcal{L}}{\partial \mathbf{a}_i^N} \right\|_2 \geq \left( \frac{1}{e} - \epsilon \right) \left\| \frac{\partial \mathcal{L}}{\partial \mathbf{a}_N^N} \right\|_2$ , for large enough  $N \geq N(\epsilon)$ , it suffices to observe that if  $\mathbf{G} \in \mathcal{O}(d)$ , then for any  $\mathbf{v} \in \mathbb{R}^d$  we have (by triangle inequality):

$$\left\| \left( \mathbf{I}_d + \frac{1}{N} \mathbf{G} \right) \mathbf{v} \right\|_2 \geq \|\mathbf{v}\|_2 - \left\| \frac{1}{N} \mathbf{G} \mathbf{v} \right\|_2 = \left( 1 - \frac{1}{N} \right) \|\mathbf{v}\|_2. \quad (17)$$

Lemma 4.1 then follows immediately from the fact that sequence:  $\{a_N : N = 1, 2, 3, \dots\}$  defined as:  $a_N = (1 - \frac{1}{N})^N$  has limit  $e^{-1}$  and by taking  $N \rightarrow \infty$ .  $\square$

## 10 Proof of Theorem 1

We first prove a number of useful Lemmas. In our derivations we frequently employ an inequality stating that for  $\alpha > 0$   $(1 + \frac{\alpha}{N})^N = \exp(N \log(1 + \frac{\alpha}{N})) \leq \exp(N \cdot \frac{\alpha}{N}) = e^\alpha$  which follows from  $\exp(\cdot)$ 's monotonicity and  $\log(\cdot)$ 's concavity and that  $\log(1) = 0, \log'(1) = 1$ .

**Lemma 1.** *If Assumption 4.3 is satisfied, then for any  $\theta' = \{\Omega'_1, \Omega'_2, \mathbf{b}', \mathbf{N}', \mathbf{Q}', \mathbf{W}'_0\} \in \mathbb{D}$  and  $\theta'' = \{\Omega''_1, \Omega''_2, \mathbf{b}'', \mathbf{N}'', \mathbf{Q}'', \mathbf{W}''_0\} \in \mathbb{D}$  such that  $\|\mathbf{N}'\|_2, \|\mathbf{Q}'\|_2, \|\mathbf{N}''\|_2, \|\mathbf{Q}''\|_2 \leq D, \|\mathbf{b}'\|_2, \|\mathbf{b}''\|_2 \leq D_b$  for some  $D, D_b > 0$  it holds that*

$$\forall \mathbf{s}', \mathbf{s}'' \in \mathbb{R}^d : \|g_{\theta'}(\mathbf{s}') - g_{\theta''}(\mathbf{s}'')\|_2 \leq e\|\mathbf{s}' - \mathbf{s}''\|_2 + \left( e\|\mathbf{s}''\|_2 + (e-1)D_b \right) \left( 1 + (e-1)\left( (1 + \frac{1}{D})e^{4D^2} - \frac{1}{D} \right) \right) \|\theta' - \theta''\|_2, \quad (18)$$

$$\|g_{\theta''}(\mathbf{s}'')\|_2 \leq e\|\mathbf{s}''\|_2 + (e-1)D_b. \quad (19)$$

*Proof.* Indeed,

$$\begin{aligned} \|g_{\theta'}(\mathbf{s}') - g_{\theta''}(\mathbf{s}'')\|_2 &= \|g_{\theta'}(\mathbf{s}') - g_{\theta'}(\mathbf{s}'') + g_{\theta'}(\mathbf{s}'') - g_{\theta''}(\mathbf{s}'')\|_2 \\ &\leq \|g_{\theta'}(\mathbf{s}') - g_{\theta'}(\mathbf{s}'')\|_2 + \|g_{\theta'}(\mathbf{s}'') - g_{\theta''}(\mathbf{s}'')\|_2. \end{aligned} \quad (20)$$

Let  $\mathbf{x}'_1, \dots, \mathbf{x}'_N$  and  $\mathbf{x}''_1, \dots, \mathbf{x}''_N$  be rollouts (5-6) corresponding to computation of  $g_{\theta'}(\mathbf{s}')$  and  $g_{\theta''}(\mathbf{s}'')$  respectively. For any Stiefel matrix  $\Omega \in \mathcal{ST}(d_1, d_2)$  (including square orthogonal matrices) it holds that  $\|\Omega\|_2 = 1$ . We use it to deduce:

$$\begin{aligned} \|g_{\theta'}(\mathbf{s}') - g_{\theta''}(\mathbf{s}'')\|_2 &= \|\Omega'_2 \mathbf{x}'_N - \Omega'_2 \mathbf{x}''_N\|_2 \leq \|\Omega'_2\|_2 \|\mathbf{x}'_N - \mathbf{x}''_N\|_2 = \|\mathbf{x}'_N - \mathbf{x}''_N\|_2 \\ &= \|\mathbf{x}'_{N-1} - \mathbf{x}''_{N-1} + \frac{1}{N} \left( f(\mathbf{W}_N \mathbf{x}'_{N-1} + \mathbf{b}) - f(\mathbf{W}_N \mathbf{x}''_{N-1} + \mathbf{b}) \right)\|_2 \\ &\leq \|\mathbf{x}'_{N-1} - \mathbf{x}''_{N-1}\|_2 + \frac{1}{N} \|f(\mathbf{W}_N \mathbf{x}'_{N-1} + \mathbf{b}) - f(\mathbf{W}_N \mathbf{x}''_{N-1} + \mathbf{b})\|_2 \\ &\leq \|\mathbf{x}'_{N-1} - \mathbf{x}''_{N-1}\|_2 + \frac{1}{N} \|\mathbf{W}_N \mathbf{x}'_{N-1} - \mathbf{W}_N \mathbf{x}''_{N-1}\|_2 \\ &= \|\mathbf{x}'_{N-1} - \mathbf{x}''_{N-1}\|_2 + \frac{1}{N} \|\mathbf{x}'_{N-1} - \mathbf{x}''_{N-1}\|_2 \\ &= (1 + \frac{1}{N}) \|\mathbf{x}'_{N-1} - \mathbf{x}''_{N-1}\|_2 \leq \dots \leq (1 + \frac{1}{N})^N \|\mathbf{x}'_0 - \mathbf{x}''_0\|_2 \\ &\leq e\|\mathbf{x}'_0 - \mathbf{x}''_0\|_2^2 = e\|\Omega'_1 \mathbf{s}' - \Omega'_1 \mathbf{s}''\|_2^2 \leq e\|\Omega'_1\|_2 \|\mathbf{s}' - \mathbf{s}''\|_2^2 = e\|\mathbf{s}' - \mathbf{s}''\|_2^2. \end{aligned} \quad (21)$$

Let  $\mathbf{x}'_1, \mathbf{W}'_1, \dots, \mathbf{x}'_N, \mathbf{W}'_N$  and  $\mathbf{x}''_1, \mathbf{W}''_1, \dots, \mathbf{x}''_N, \mathbf{W}''_N$  be rollouts (5-6) corresponding to computation of  $g_{\theta'}(\mathbf{s}')$  and  $g_{\theta''}(\mathbf{s}'')$  respectively. We fix  $i \in \{1, \dots, N\}$  and deduce, using Assumption 4.3 in particular, that

$$\begin{aligned} \|\mathbf{x}''_i\|_2 &\leq \|\mathbf{x}''_{i-1}\|_2 + \frac{1}{N} \|f(\mathbf{W}''_i \mathbf{x}''_{i-1} + \mathbf{b}'')\|_2 \leq \|\mathbf{x}''_{i-1}\|_2 + \frac{1}{N} \|\mathbf{W}''_i \mathbf{x}''_{i-1} + \mathbf{b}''\|_2 \\ &\leq \|\mathbf{x}''_{i-1}\|_2 + \frac{1}{N} \|\mathbf{W}''_i \mathbf{x}''_{i-1}\|_2 + \frac{1}{N} \|\mathbf{b}''\|_2 = (1 + \frac{1}{N}) \|\mathbf{x}''_{i-1}\|_2 + \frac{1}{N} \|\mathbf{b}''\|_2 \\ &\leq (1 + \frac{1}{N})^i \|\mathbf{x}''_0\|_2 + \frac{1}{N} \|\mathbf{b}''\|_2 \sum_{j=0}^{i-1} (1 + \frac{1}{N})^j = (1 + \frac{1}{N})^i \|\Omega''_1 \mathbf{s}''\|_2 \\ &+ ((1 + \frac{1}{N})^i - 1) \|\mathbf{b}''\|_2 = (1 + \frac{1}{N})^i \|\Omega''_1\|_2 \|\mathbf{s}''\|_2 + ((1 + \frac{1}{N})^i - 1) D_b \\ &\leq (1 + \frac{1}{N})^N \|\mathbf{s}''\|_2 + ((1 + \frac{1}{N})^N - 1) D_b \\ &\leq e\|\mathbf{s}''\|_2 + (e-1)D_b. \end{aligned} \quad (22)$$

As a particular case of (22) when  $i = N$  and  $\|g_{\theta''}(\mathbf{s}'')\|_2 = \|\Omega_2' \mathbf{x}_N''\|_2 \leq \|\mathbf{x}_N''\|_2$  we obtain (19). Set

$$\begin{aligned}\mathbf{A}' &= \frac{1}{N}(\mathbf{W}'_{i-1}{}^\top \mathbf{Q}' \mathbf{W}'_{i-1} \mathbf{N}' - \mathbf{N}' \mathbf{W}'_{i-1}{}^\top \mathbf{Q}' \mathbf{W}'_{i-1}), \\ \mathbf{A}'' &= \frac{1}{N}(\mathbf{W}''_{i-1}{}^\top \mathbf{Q}'' \mathbf{W}''_{i-1} \mathbf{N}'' - \mathbf{N}'' \mathbf{W}''_{i-1}{}^\top \mathbf{Q}'' \mathbf{W}''_{i-1}).\end{aligned}$$

Since  $\mathbf{A}', \mathbf{A}'' \in \text{Skew}(d)$  and  $\text{Skew}(d)$  is a vector space, we conclude that  $\exp(\alpha \mathbf{A}' + \alpha t(\mathbf{A}'' - \mathbf{A}')) \in \mathcal{O}(d)$  for any  $t, \alpha \in \mathbb{R}$  where we use that  $\exp(\cdot)$  maps  $\text{Skew}(d)$  into  $\mathcal{O}(d)$ . We also use a rule [51] which states that for  $\mathbf{X} : \mathbb{R} \rightarrow \mathbb{R}^{d \times d}$

$$\frac{d}{dt} \exp(\mathbf{X}(t)) = \int_0^1 \exp(\alpha \mathbf{X}(t)) \frac{d\mathbf{X}(t)}{dt} \exp((1-\alpha)\mathbf{X}(t)) d\alpha$$

to deduce that

$$\begin{aligned}\|\exp(\mathbf{A}') - \exp(\mathbf{A}'')\|_2^2 &= \left\| \int_{t=0}^1 \frac{d}{dt} \exp(\mathbf{A}'' + t(\mathbf{A}' - \mathbf{A}'')) dt \right\|_2^2 \\ &= \left\| \int_0^1 \int_0^1 \exp\left(\alpha \mathbf{A}'' + \alpha t(\mathbf{A}' - \mathbf{A}'')\right) (\mathbf{A}' - \mathbf{A}'') \exp\left((1-\alpha)\mathbf{A}'' + (1-\alpha)t(\mathbf{A}' - \mathbf{A}'')\right) d\alpha dt \right\|_2^2 \\ &\leq \int_0^1 \int_0^1 \left\| \exp\left(\alpha \mathbf{A}'' + \alpha t(\mathbf{A}' - \mathbf{A}'')\right) (\mathbf{A}' - \mathbf{A}'') \exp\left((1-\alpha)\mathbf{A}'' + (1-\alpha)t(\mathbf{A}' - \mathbf{A}'')\right) \right\|_2^2 d\alpha dt \\ &= \int_0^1 \int_0^1 \|\mathbf{A}' - \mathbf{A}''\|_2^2 d\alpha dt = \|\mathbf{A}' - \mathbf{A}''\|_2^2.\end{aligned}$$

Consequently, we derive that

$$\begin{aligned}\|\mathbf{W}'_i - \mathbf{W}''_i\|_2 &= \|\mathbf{W}'_{i-1} \exp(\mathbf{A}') - \mathbf{W}''_{i-1} \exp(\mathbf{A}'')\|_2 \\ &= \|\mathbf{W}'_{i-1} \exp(\mathbf{A}') - \mathbf{W}''_{i-1} \exp(\mathbf{A}') + \mathbf{W}''_{i-1} \exp(\mathbf{A}') - \mathbf{W}''_{i-1} \exp(\mathbf{A}'')\|_2 \\ &\leq \|\mathbf{W}'_{i-1} \exp(\mathbf{A}') - \mathbf{W}''_{i-1} \exp(\mathbf{A}')\|_2 + \|\mathbf{W}''_{i-1} \exp(\mathbf{A}') - \mathbf{W}''_{i-1} \exp(\mathbf{A}'')\|_2 \\ &= \|\mathbf{W}'_{i-1} - \mathbf{W}''_{i-1}\|_2 + \|\exp(\mathbf{A}') - \exp(\mathbf{A}'')\|_2 \leq \|\mathbf{W}'_{i-1} - \mathbf{W}''_{i-1}\|_2 + \|\mathbf{A}' - \mathbf{A}''\|_2 \\ &= \|\mathbf{W}'_{i-1} - \mathbf{W}''_{i-1}\|_2 + \frac{1}{N} \left\| (\mathbf{W}'_{i-1}{}^\top \mathbf{Q}' \mathbf{W}'_{i-1} \mathbf{N}' - \mathbf{W}''_{i-1}{}^\top \mathbf{Q}'' \mathbf{W}''_{i-1} \mathbf{N}'') - (\mathbf{N}' \mathbf{W}'_{i-1}{}^\top \mathbf{Q}' \mathbf{W}'_{i-1} - \mathbf{N}'' \mathbf{W}''_{i-1}{}^\top \mathbf{Q}'' \mathbf{W}''_{i-1}) \right\|_2 \\ &\leq \|\mathbf{W}'_{i-1} - \mathbf{W}''_{i-1}\|_2 + \frac{1}{N} \|\mathbf{W}'_{i-1}{}^\top \mathbf{Q}' \mathbf{W}'_{i-1} \mathbf{N}' - \mathbf{W}''_{i-1}{}^\top \mathbf{Q}'' \mathbf{W}''_{i-1} \mathbf{N}''\|_2 + \frac{1}{N} \|\mathbf{N}' \mathbf{W}'_{i-1}{}^\top \mathbf{Q}' \mathbf{W}'_{i-1} - \mathbf{N}'' \mathbf{W}''_{i-1}{}^\top \mathbf{Q}'' \mathbf{W}''_{i-1}\|_2 \\ &= \|\mathbf{W}'_{i-1} - \mathbf{W}''_{i-1}\|_2 + \frac{1}{N} \|\mathbf{W}'_{i-1}{}^\top \mathbf{Q}' \mathbf{W}'_{i-1} \mathbf{N}' - \mathbf{W}''_{i-1}{}^\top \mathbf{Q}'' \mathbf{W}''_{i-1} \mathbf{N}'' + \mathbf{W}'_{i-1}{}^\top \mathbf{Q}' \mathbf{W}''_{i-1} \mathbf{N}'' - \mathbf{W}''_{i-1}{}^\top \mathbf{Q}'' \mathbf{W}'_{i-1} \mathbf{N}'\|_2 \\ &\quad + \frac{1}{N} \|\mathbf{N}' \mathbf{W}'_{i-1}{}^\top \mathbf{Q}' \mathbf{W}'_{i-1} - \mathbf{N}'' \mathbf{W}''_{i-1}{}^\top \mathbf{Q}'' \mathbf{W}''_{i-1} + \mathbf{N}' \mathbf{W}'_{i-1}{}^\top \mathbf{Q}'' \mathbf{W}''_{i-1} - \mathbf{N}'' \mathbf{W}''_{i-1}{}^\top \mathbf{Q}' \mathbf{W}'_{i-1}\|_2 \\ &\leq \|\mathbf{W}'_{i-1} - \mathbf{W}''_{i-1}\|_2 + \frac{1}{N} \|\mathbf{W}'_{i-1}{}^\top \mathbf{Q}' \mathbf{W}'_{i-1} \mathbf{N}' - \mathbf{W}''_{i-1}{}^\top \mathbf{Q}'' \mathbf{W}''_{i-1} \mathbf{N}''\|_2 + \frac{1}{N} \|\mathbf{W}'_{i-1}{}^\top \mathbf{Q}' \mathbf{W}''_{i-1} \mathbf{N}'' - \mathbf{W}''_{i-1}{}^\top \mathbf{Q}'' \mathbf{W}'_{i-1} \mathbf{N}'\|_2 \\ &\quad + \frac{1}{N} \|\mathbf{N}' \mathbf{W}'_{i-1}{}^\top \mathbf{Q}' \mathbf{W}'_{i-1} - \mathbf{N}'' \mathbf{W}''_{i-1}{}^\top \mathbf{Q}'' \mathbf{W}''_{i-1}\|_2 + \frac{1}{N} \|\mathbf{N}' \mathbf{W}'_{i-1}{}^\top \mathbf{Q}'' \mathbf{W}''_{i-1} - \mathbf{N}'' \mathbf{W}''_{i-1}{}^\top \mathbf{Q}' \mathbf{W}'_{i-1}\|_2 \\ &\leq \|\mathbf{W}'_{i-1} - \mathbf{W}''_{i-1}\|_2 + \frac{1}{N} \|\mathbf{Q}'\|_2 \|\mathbf{W}'_{i-1} \mathbf{N}' - \mathbf{W}''_{i-1} \mathbf{N}''\|_2 + \frac{1}{N} \|\mathbf{N}''\|_2 \|\mathbf{W}'_{i-1}{}^\top \mathbf{Q}' - \mathbf{W}''_{i-1}{}^\top \mathbf{Q}''\|_2\end{aligned}$$

$$\begin{aligned}
& + \frac{1}{N} \|\mathbf{N}'\|_2 \|\mathbf{Q}' \mathbf{W}'_{i-1} - \mathbf{Q}'' \mathbf{W}''_{i-1}\|_2 + \frac{1}{N} \|\mathbf{Q}''\|_2 \|\mathbf{N}' \mathbf{W}'_{i-1}{}^\top - \mathbf{N}'' \mathbf{W}''_{i-1}{}^\top\|_2 \\
& \leq \|\mathbf{W}'_{i-1} - \mathbf{W}''_{i-1}\|_2 + \frac{D}{N} \|\mathbf{W}'_{i-1} \mathbf{N}' - \mathbf{W}''_{i-1} \mathbf{N}''\|_2 + \frac{D}{N} \|\mathbf{W}'_{i-1}{}^\top \mathbf{Q}' - \mathbf{W}''_{i-1}{}^\top \mathbf{Q}''\|_2 \\
& + \frac{D}{N} \|\mathbf{Q}' \mathbf{W}'_{i-1} - \mathbf{Q}'' \mathbf{W}''_{i-1}\|_2 + \frac{D}{N} \|\mathbf{N}' \mathbf{W}'_{i-1}{}^\top - \mathbf{N}'' \mathbf{W}''_{i-1}{}^\top\|_2 \\
& = \|\mathbf{W}'_{i-1} - \mathbf{W}''_{i-1}\|_2 + \frac{D}{N} \|\mathbf{W}'_{i-1} \mathbf{N}' - \mathbf{W}'_{i-1} \mathbf{N}'' + \mathbf{W}'_{i-1} \mathbf{N}'' - \mathbf{W}''_{i-1} \mathbf{N}''\|_2 + \frac{D}{N} \|\mathbf{W}'_{i-1}{}^\top \mathbf{Q}' \\
& - \mathbf{W}'_{i-1}{}^\top \mathbf{Q}'' + \mathbf{W}'_{i-1}{}^\top \mathbf{Q}'' - \mathbf{W}''_{i-1}{}^\top \mathbf{Q}''\|_2 + \frac{D}{N} \|\mathbf{Q}' \mathbf{W}'_{i-1} - \mathbf{Q}' \mathbf{W}''_{i-1} + \mathbf{Q}' \mathbf{W}''_{i-1} - \mathbf{Q}'' \mathbf{W}''_{i-1}\|_2 \\
& + \frac{D}{N} \|\mathbf{N}' \mathbf{W}'_{i-1}{}^\top - \mathbf{N}' \mathbf{W}''_{i-1}{}^\top + \mathbf{N}' \mathbf{W}''_{i-1}{}^\top - \mathbf{N}'' \mathbf{W}''_{i-1}{}^\top\|_2 \\
& \leq \|\mathbf{W}'_{i-1} - \mathbf{W}''_{i-1}\|_2 + \frac{D}{N} \|\mathbf{W}'_{i-1} \mathbf{N}' - \mathbf{W}'_{i-1} \mathbf{N}''\|_2 + \frac{D}{N} \|\mathbf{W}'_{i-1} \mathbf{N}'' - \mathbf{W}''_{i-1} \mathbf{N}''\|_2 \\
& + \frac{D}{N} \|\mathbf{W}'_{i-1}{}^\top \mathbf{Q}' - \mathbf{W}'_{i-1}{}^\top \mathbf{Q}''\|_2 + \frac{D}{N} \|\mathbf{W}'_{i-1}{}^\top \mathbf{Q}'' - \mathbf{W}''_{i-1}{}^\top \mathbf{Q}''\|_2 + \frac{D}{N} \|\mathbf{Q}' \mathbf{W}'_{i-1} - \mathbf{Q}' \mathbf{W}''_{i-1}\|_2 \\
& + \frac{D}{N} \|\mathbf{Q}' \mathbf{W}''_{i-1} - \mathbf{Q}'' \mathbf{W}''_{i-1}\|_2 + \frac{D}{N} \|\mathbf{N}' \mathbf{W}'_{i-1}{}^\top - \mathbf{N}' \mathbf{W}''_{i-1}{}^\top\|_2 + \frac{D}{N} \|\mathbf{N}' \mathbf{W}''_{i-1}{}^\top - \mathbf{N}'' \mathbf{W}''_{i-1}{}^\top\|_2 \\
& \leq \|\mathbf{W}'_{i-1} - \mathbf{W}''_{i-1}\|_2 + \frac{D}{N} \|\mathbf{N}' - \mathbf{N}''\|_2 + \frac{D}{N} \|\mathbf{N}''\|_2 \|\mathbf{W}'_{i-1} - \mathbf{W}''_{i-1}\|_2 + \frac{D}{N} \|\mathbf{Q}' - \mathbf{Q}''\|_2 \\
& + \frac{D}{N} \|\mathbf{Q}''\|_2 \|\mathbf{W}'_{i-1}{}^\top - \mathbf{W}''_{i-1}{}^\top\|_2 + \frac{D}{N} \|\mathbf{Q}'\|_2 \|\mathbf{W}'_{i-1} - \mathbf{W}''_{i-1}\|_2 + \frac{D}{N} \|\mathbf{Q}' - \mathbf{Q}''\|_2 \\
& + \frac{D}{N} \|\mathbf{N}'\|_2 \|\mathbf{W}'_{i-1}{}^\top - \mathbf{W}''_{i-1}{}^\top\|_2 + \frac{D}{N} \|\mathbf{N}' - \mathbf{N}''\|_2 \\
& \leq (1 + 4 \frac{D^2}{N}) \|\mathbf{W}'_{i-1} - \mathbf{W}''_{i-1}\|_2 + 2 \frac{D}{N} \|\mathbf{N}' - \mathbf{N}''\|_2 + 2 \frac{D}{N} \|\mathbf{Q}' - \mathbf{Q}''\|_2 \\
& \leq (1 + 4 \frac{D^2}{N}) \|\mathbf{W}'_{i-1} - \mathbf{W}''_{i-1}\|_2 + 4 \frac{D}{N} \|\theta' - \theta''\|_2 \leq \dots \\
& \leq (1 + 4 \frac{D^2}{N})^i \|\mathbf{W}'_0 - \mathbf{W}''_0\|_2 + 4 \frac{D}{N} \sum_{j=0}^{i-1} (1 + 4 \frac{D^2}{N})^j \|\theta' - \theta''\|_2 \\
& = (1 + 4 \frac{D^2}{N})^i \|\mathbf{W}'_0 - \mathbf{W}''_0\|_2 + \frac{1}{D} ((1 + 4 \frac{D^2}{N})^i - 1) \|\theta' - \theta''\|_2 \\
& \leq (1 + 4 \frac{D^2}{N})^i \|\theta' - \theta''\|_2 + \frac{1}{D} ((1 + 4 \frac{D^2}{N})^i - 1) \|\theta' - \theta''\|_2 \\
& = \left( (1 + \frac{1}{D}) (1 + 4 \frac{D^2}{N})^i - \frac{1}{D} \right) \|\theta' - \theta''\|_2 \leq \left( (1 + \frac{1}{D}) (1 + 4 \frac{D^2}{N})^N - \frac{1}{D} \right) \|\theta' - \theta''\|_2 \\
& \leq \left( (1 + \frac{1}{D}) e^{4D^2} - \frac{1}{D} \right) \|\theta' - \theta''\|_2
\end{aligned}$$

We use (22) and derive that

$$\begin{aligned}
\|\mathbf{x}'_i - \mathbf{x}''_i\|_2 & = \|\mathbf{x}'_{i-1} - \mathbf{x}''_{i-1} + \frac{1}{N} (f(\mathbf{W}'_i \mathbf{x}'_{i-1} + \mathbf{b}) - f(\mathbf{W}''_i \mathbf{x}''_{i-1} + \mathbf{b}))\|_2 \\
& \leq \|\mathbf{x}'_{i-1} - \mathbf{x}''_{i-1}\|_2 + \frac{1}{N} \|f(\mathbf{W}'_i \mathbf{x}'_{i-1} + \mathbf{b}) - f(\mathbf{W}''_i \mathbf{x}''_{i-1} + \mathbf{b})\|_2 \\
& \leq \|\mathbf{x}'_{i-1} - \mathbf{x}''_{i-1}\|_2 + \frac{1}{N} \|\mathbf{W}'_i \mathbf{x}'_{i-1} - \mathbf{W}''_i \mathbf{x}''_{i-1}\|_2 \\
& \leq \|\mathbf{x}'_{i-1} - \mathbf{x}''_{i-1}\|_2 + \frac{1}{N} \|\mathbf{W}'_i \mathbf{x}'_{i-1} - \mathbf{W}'_i \mathbf{x}''_{i-1} + \mathbf{W}'_i \mathbf{x}''_{i-1} - \mathbf{W}''_i \mathbf{x}''_{i-1}\|_2 \\
& \leq \|\mathbf{x}'_{i-1} - \mathbf{x}''_{i-1}\|_2 + \frac{1}{N} \|\mathbf{W}'_i \mathbf{x}'_{i-1} - \mathbf{W}'_i \mathbf{x}''_{i-1}\|_2 + \frac{1}{N} \|\mathbf{W}'_i \mathbf{x}''_{i-1} - \mathbf{W}''_i \mathbf{x}''_{i-1}\|_2 \\
& \leq (1 + \frac{1}{N}) \|\mathbf{x}'_{i-1} - \mathbf{x}''_{i-1}\|_2 + \frac{1}{N} \|\mathbf{x}''_{i-1}\|_2 \|\mathbf{W}'_i - \mathbf{W}''_i\|_2
\end{aligned}$$

$$\begin{aligned}
&\leq (1 + \frac{1}{N})\|\mathbf{x}'_{i-1} - \mathbf{x}''_{i-1}\|_2 + \frac{1}{N}\left(e\|\mathbf{s}''\|_2 + (e-1)D_b\right)\|\mathbf{W}'_i - \mathbf{W}''_i\|_2 \\
&\leq (1 + \frac{1}{N})\|\mathbf{x}'_{i-1} - \mathbf{x}''_{i-1}\|_2 \\
&\quad + \frac{1}{N}\left(e\|\mathbf{s}''\|_2 + (e-1)D_b\right)\left(\left(1 + \frac{1}{D}\right)e^{4D^2} - \frac{1}{D}\right)\|\theta' - \theta''\|_2
\end{aligned}$$

By aggregating the last inequality for  $i \in \{1, \dots, N\}$  we conclude that

$$\begin{aligned}
\|g_{\theta'}(\mathbf{s}'') - g_{\theta''}(\mathbf{s}'')\|_2 &= \|\Omega'_2 \mathbf{x}'_N - \Omega''_2 \mathbf{x}''_N\|_2 = \|\Omega'_2 \mathbf{x}'_N - \Omega'_2 \mathbf{x}''_N + \Omega'_2 \mathbf{x}''_N - \Omega''_2 \mathbf{x}''_N\|_2 \\
&\leq \|\Omega'_2\|_2 \|\mathbf{x}'_N - \mathbf{x}''_N\|_2 + \|\mathbf{x}''_N\|_2 \|\Omega'_2 - \Omega''_2\|_2 \\
&\leq \|\mathbf{x}'_N - \mathbf{x}''_N\|_2 + \left(e\|\mathbf{s}''\|_2 + (e-1)D_b\right)\|\theta' - \theta''\|_2 \\
&\leq (1 + \frac{1}{N})^N \|\mathbf{x}'_0 - \mathbf{x}''_0\|_2 \\
&\quad + \left(e\|\mathbf{s}''\|_2 + (e-1)D_b\right)\left(1 + \sum_{j=0}^{i-1} (1 + \frac{1}{N})^j \cdot \frac{1}{N} \left(\left(1 + \frac{1}{D}\right)e^{4D^2} - \frac{1}{D}\right)\right)\|\theta' - \theta''\|_2 \\
&\leq (1 + \frac{1}{N})^N \|\mathbf{s}'' - \mathbf{s}''\|_2 \\
&\quad + \left(e\|\mathbf{s}''\|_2 + (e-1)D_b\right)\left(1 + \left((1 + \frac{1}{N})^N - 1\right)\left(\left(1 + \frac{1}{D}\right)e^{4D^2} - \frac{1}{D}\right)\right)\|\theta' - \theta''\|_2 \\
&\leq \left(e\|\mathbf{s}''\|_2 + (e-1)D_b\right)\left(1 + (e-1)\left(\left(1 + \frac{1}{D}\right)e^{4D^2} - \frac{1}{D}\right)\right)\|\theta' - \theta''\|_2
\end{aligned}$$

The inequality above together with (20) and (21) concludes the proof of bound (18).  $\square$

**Lemma 2.** *If Assumptions 4.2, 4.3 are satisfied, then for any  $\theta' = \{\Omega'_1, \Omega'_2, \mathbf{b}', \mathbf{N}', \mathbf{Q}', \mathbf{W}'_0\} \in \mathbb{D}$  and  $\theta'' = \{\Omega''_1, \Omega''_2, \mathbf{b}'', \mathbf{N}'', \mathbf{Q}'', \mathbf{W}''_0\} \in \mathbb{D}$  such that  $\|\mathbf{N}'\|_2, \|\mathbf{Q}'\|_2, \|\mathbf{N}''\|_2, \|\mathbf{Q}''\|_2 \leq D, \|\mathbf{b}'\|_2, \|\mathbf{b}''\|_2 \leq D_b$  for some  $D, D_b > 0$  it holds that*

$$|F(\theta') - F(\theta'')| \leq \mathcal{C}\|\theta' - \theta''\|_2$$

where

$$\begin{aligned}
\mathcal{C} &= L_2 K \left( (1+e)\gamma(K)L_1 + 1 \right) \left( eL_1^K (1+e)^K + 1 \right) \|\mathbf{s}_0\|_2 + \gamma(K) \left( L_1 \left( (e-1)D_b + \|\mathbf{s}_0\|_2 \right. \right. \\
&\quad \left. \left. + \|\widehat{\mathbf{a}}\|_2 \right) + \|\text{env}^{(1)}(\mathbf{s}_0, \widehat{\mathbf{a}})\|_2 \right) + (e-1)D_b \left( 1 + (e-1)\left(\left(1 + \frac{1}{D}\right)e^{4D^2} - \frac{1}{D}\right) \right) \\
\gamma(k) &= \begin{cases} k, & \text{if } L_1(1+e) = 1 \\ \frac{L_1^k(1+e)^k - 1}{L_1(1+e) - 1}, & \text{otherwise} \end{cases}
\end{aligned}$$

and  $\widehat{\mathbf{a}}$  is an arbitrary fixed vector from  $\mathbb{R}^m$ .

*Proof.* Let  $\mathbf{s}'_1, l'_1, \dots, \mathbf{s}'_K, l'_K$  and  $\mathbf{s}''_0, l''_1, \dots, \mathbf{s}''_K, l''_K$  be rollouts of (7) for  $\theta'$  and  $\theta''$  respectively starting from  $\mathbf{s}'_0 = \mathbf{s}''_0 = \mathbf{s}_0$ . In the light of Assumption 4.2 and Lemma 1 for any  $k \in \{1, \dots, K\}$  we have  $\mathbf{s}''_k = \text{env}^{(1)}(\mathbf{s}''_{k-1}, g_{\theta''}(\mathbf{s}''_{k-1}))$  and, therefore,

$$\begin{aligned}
\|\mathbf{s}''_k\|_2 &= \|\text{env}^{(1)}(\mathbf{s}''_{k-1}, g_{\theta''}(\mathbf{s}''_{k-1})) - \text{env}^{(1)}(\mathbf{s}_0, \widehat{\mathbf{a}}) + \text{env}^{(1)}(\mathbf{s}_0, \widehat{\mathbf{a}})\|_2 \\
&\leq \|\text{env}^{(1)}(\mathbf{s}''_{k-1}, g_{\theta''}(\mathbf{s}''_{k-1})) - \text{env}^{(1)}(\mathbf{s}_0, \widehat{\mathbf{a}})\|_2 + \|\text{env}^{(1)}(\mathbf{s}_0, \widehat{\mathbf{a}})\|_2 \\
&\leq L_1 \left( \|\mathbf{s}''_{k-1} - \mathbf{s}_0\|_2 + \|g_{\theta''}(\mathbf{s}''_{k-1}) - \widehat{\mathbf{a}}\|_2 \right) + \|\text{env}^{(1)}(\mathbf{s}_0, \widehat{\mathbf{a}})\|_2 \\
&\leq L_1 \|\mathbf{s}''_{k-1}\|_2 + L_1 \|\mathbf{s}_0\|_2 + L_1 \|g_{\theta''}(\mathbf{s}''_{k-1})\|_2 + L_1 \|\widehat{\mathbf{a}}\|_2 + \|\text{env}^{(1)}(\mathbf{s}_0, \widehat{\mathbf{a}})\|_2 \\
&\leq L_1(1+e)\|\mathbf{s}''_{k-1}\|_2 + L_1((e-1)D_b + \|\mathbf{s}_0\|_2 + \|\widehat{\mathbf{a}}\|_2) + \|\text{env}^{(1)}(\mathbf{s}_0, \widehat{\mathbf{a}})\|_2 \leq \dots
\end{aligned}$$

$$\begin{aligned}
&\leq L_1^k(1+e)^k\|\mathbf{s}_0\|_2 + \sum_{j=0}^{k-1} L_1^j(1+e)^j \left( L_1((e-1)D_b + \|\mathbf{s}_0\|_2 + \|\widehat{\mathbf{a}}\|_2) + \|\text{env}^{(1)}(\mathbf{s}_0, \widehat{\mathbf{a}})\|_2 \right) \\
&\leq L_1^k(1+e)^k\|\mathbf{s}_0\|_2 + \gamma(k) \left( L_1((e-1)D_b + \|\mathbf{s}_0\|_2 + \|\widehat{\mathbf{a}}\|_2) + \|\text{env}^{(1)}(\mathbf{s}_0, \widehat{\mathbf{a}})\|_2 \right) \\
&\leq L_1^K(1+e)^K\|\mathbf{s}_0\|_2 + \gamma(K) \left( L_1((e-1)D_b + \|\mathbf{s}_0\|_2 + \|\widehat{\mathbf{a}}\|_2) + \|\text{env}^{(1)}(\mathbf{s}_0, \widehat{\mathbf{a}})\|_2 \right) \\
&= L_1^K(1+e)^K\|\mathbf{s}_0\|_2 + \gamma(K)\mathcal{A}
\end{aligned}$$

where we denote

$$\mathcal{A} = L_1((e-1)D_b + \|\mathbf{s}_0\|_2 + \|\widehat{\mathbf{a}}\|_2) + \|\text{env}^{(1)}(\mathbf{s}_0, \widehat{\mathbf{a}})\|_2.$$

In addition to that, denote

$$\mathcal{B} = 1 + (e-1)\left(1 + \frac{1}{D}\right)e^{4D^2} - \frac{1}{D}.$$

From the last inequality it follows that

$$\|\mathbf{s}_{k-1}''\|_2 \leq \max(\|\mathbf{s}_0\|_2, L_1^K(1+e)^K\|\mathbf{s}_0\|_2 + \gamma(K)\mathcal{A}) \leq (L_1^K(1+e)^K + 1)\|\mathbf{s}_0\|_2 + \gamma(K)\mathcal{A}$$

Next, observe that

$$\begin{aligned}
&\|\mathbf{s}'_k - \mathbf{s}''_k\|_2 = \|\text{env}^{(1)}(\mathbf{s}'_{k-1}, g_{\theta'}(\mathbf{s}'_{k-1})) - \text{env}^{(1)}(\mathbf{s}''_{k-1}, g_{\theta''}(\mathbf{s}''_{k-1}))\|_2 \\
&\leq L_1 \left( \|\mathbf{s}'_{k-1} - \mathbf{s}''_{k-1}\|_2 + \|g_{\theta'}(\mathbf{s}'_{k-1}) - g_{\theta''}(\mathbf{s}''_{k-1})\|_2 \right) \\
&\leq L_1(1+e)\|\mathbf{s}'_{k-1} - \mathbf{s}''_{k-1}\|_2 \\
&\quad + L_1 \left( e\|\mathbf{s}''_{k-1}\|_2 + (e-1)D_b \right) \left( 1 + (e-1)\left(1 + \frac{1}{D}\right)e^{4D^2} - \frac{1}{D} \right) \|\theta' - \theta''\|_2 \\
&\leq L_1(1+e)\|\mathbf{s}'_{k-1} - \mathbf{s}''_{k-1}\|_2 + L_1 \left( e((L_1^K(1+e)^K + 1)\|\mathbf{s}_0\|_2 + \gamma(K)\mathcal{A}) \right. \\
&\quad \left. + (e-1)D_b \right) \mathcal{B} \|\theta' - \theta''\|_2 \leq \dots \\
&\leq L_1^k(1+e)^k\|\mathbf{s}_0 - \mathbf{s}_0\|_2 + \sum_{j=0}^{k-1} L_1^j(1+e)^j L_1 \left( e((L_1^K(1+e)^K + 1)\|\mathbf{s}_0\|_2 + \gamma(K)\mathcal{A}) \right. \\
&\quad \left. + (e-1)D_b \right) \mathcal{B} \|\theta' - \theta''\|_2 \\
&= \gamma(k)L_1 \left( e((L_1^K(1+e)^K + 1)\|\mathbf{s}_0\|_2 + \gamma(K)\mathcal{A}) + (e-1)D_b \right) \mathcal{B} \|\theta' - \theta''\|_2 \\
&\leq \gamma(K)L_1 \left( e((L_1^K(1+e)^K + 1)\|\mathbf{s}_0\|_2 + \gamma(K)\mathcal{A}) + (e-1)D_b \right) \mathcal{B} \|\theta' - \theta''\|_2.
\end{aligned}$$

We conclude by deriving that

$$\begin{aligned}
|F(\theta') - F(\theta'')| &\leq \sum_{k=1}^K |l'_k - l''_k| \leq \sum_{k=1}^K |\text{env}^{(2)}(\mathbf{s}'_{k-1}, g_{\theta'}(\mathbf{s}'_{k-1})) - \text{env}^{(2)}(\mathbf{s}''_{k-1}, g_{\theta''}(\mathbf{s}''_{k-1}))| \\
&\leq \sum_{k=1}^K L_2 \left( \|\mathbf{s}'_{k-1} - \mathbf{s}''_{k-1}\|_2 + \|g_{\theta'}(\mathbf{s}'_{k-1}) - g_{\theta''}(\mathbf{s}''_{k-1})\|_2 \right) \\
&\leq L_2 \sum_{k=1}^K \left( (1+e)\|\mathbf{s}'_{k-1} - \mathbf{s}''_{k-1}\|_2 + \left( e\|\mathbf{s}''_{k-1}\|_2 + (e-1)D_b \right) \mathcal{B} \|\theta' - \theta''\|_2 \right) \\
&\leq L_2 \sum_{k=1}^K \left( (1+e)\|\mathbf{s}'_{k-1} - \mathbf{s}''_{k-1}\|_2 \right.
\end{aligned}$$

$$\begin{aligned}
& + \left( e(L_1^K(1+e)^K + 1)\|\mathbf{s}_0\|_2 + \gamma(K)\mathcal{A} + (e-1)D_b \right) \mathcal{B}\|\theta' - \theta''\|_2 \\
& \leq L_2 \sum_{k=1}^K \left( (1+e)\gamma(K)L_1 \left( e((L_1^K(1+e)^K + 1)\|\mathbf{s}_0\|_2 + \gamma(K)\mathcal{A}) + (e-1)D_b \right) \right. \\
& \quad \times \mathcal{B}\|\theta' - \theta''\|_2 + \left. \left( e(L_1^K(1+e)^K + 1)\|\mathbf{s}_0\|_2 + \gamma(K)\mathcal{A} + (e-1)D_b \right) \mathcal{B}\|\theta' - \theta''\|_2 \right) \\
& = L_2K((1+e)\gamma(K)L_1 + 1) \left( e(L_1^K(1+e)^K + 1)\|\mathbf{s}_0\|_2 + \gamma(K)\mathcal{A} \right. \\
& \quad \left. + (e-1)D_b \right) \mathcal{B}\|\theta' - \theta''\|_2
\end{aligned}$$

□

**Lemma 3.** *If Assumptions 4.2, 4.3 are satisfied, then for any  $\theta' = \{\Omega'_1, \Omega'_2, \mathbf{b}', \mathbf{N}', \mathbf{Q}', \mathbf{W}'_0\} \in \mathbb{D}$  and  $\theta'' = \{\Omega''_1, \Omega''_2, \mathbf{b}'', \mathbf{N}'', \mathbf{Q}'', \mathbf{W}''_0\} \in \mathbb{D}$  such that  $\|\mathbf{N}'\|_2, \|\mathbf{Q}'\|_2, \|\mathbf{N}''\|_2, \|\mathbf{Q}''\|_2 \leq D, \|\mathbf{b}'\|_2, \|\mathbf{b}''\|_2 \leq D_b$  for some  $D, D_b > 0$  it holds that*

$$\|\nabla F_\sigma(\theta') - \nabla F_\sigma(\theta'')\|_2 \leq \frac{\mathcal{C}\sqrt{l}}{\sigma} \|\theta' - \theta''\|_2$$

where  $\mathcal{C}$  is from the definition of Lemma 2.

*Proof.* We deduce that

$$\begin{aligned}
\|\nabla F_\sigma(\theta') - \nabla F_\sigma(\theta'')\|_2^2 &= \frac{1}{\sigma^2} \|\mathbb{E}_{\epsilon \sim \mathcal{N}(0, I)} (F(\theta' + \sigma\epsilon) - F(\theta'' + \sigma\epsilon))\epsilon\|_2^2 \\
&\leq \frac{1}{\sigma^2} \mathbb{E}_{\epsilon \sim \mathcal{N}(0, I)} \|(F(\theta' + \sigma\epsilon) - F(\theta'' + \sigma\epsilon))\epsilon\|_2^2 \\
&= \frac{1}{\sigma^2} \mathbb{E}_{\epsilon \sim \mathcal{N}(0, I)} (F(\theta' + \sigma\epsilon) - F(\theta'' + \sigma\epsilon))^2 \|\epsilon\|_2^2 \\
&\leq \frac{1}{\sigma^2} \mathbb{E}_{\epsilon \sim \mathcal{N}(0, I)} \mathcal{C}^2 \|\theta' - \theta''\|_2^2 \|\epsilon\|_2^2 \\
&= \frac{\mathcal{C}^2}{\sigma^2} \|\theta' - \theta''\|_2^2 \cdot \mathbb{E}_{\epsilon \sim \mathcal{N}(0, I)} \|\epsilon\|_2^2 = \frac{\mathcal{C}^2 \cdot l}{\sigma^2} \|\theta' - \theta''\|_2^2.
\end{aligned}$$

□

**Lemma 4.** *If Assumption 4.2 is satisfied, then for any  $\theta \in \mathbb{D}$*

$$\mathbb{E}\|\tilde{\nabla} F_\sigma(\theta)\|_2^2 \leq \frac{K^2 M^2 l}{\sigma^2}.$$

*Proof.* By using Assumption 4.2 and that  $|F(\theta)| = |\sum_{k=1}^K l_k| \leq KM$  we derive

$$\begin{aligned}
(\mathbb{E}\|\tilde{\nabla} F_\sigma(\theta)\|_2)^2 &\leq \mathbb{E}\|\tilde{\nabla}_\theta F_\sigma(\theta)\|_2^2 = \frac{1}{v^2 \sigma^2} \mathbb{E}_{\{\epsilon_w \sim \mathcal{N}(0, I)\}} \left\| \sum_{w=1}^v F(\theta + \sigma\epsilon_w) \epsilon_w \right\|_2^2 \\
&\leq \frac{1}{v \sigma^2} \mathbb{E}_{\{\epsilon_w \sim \mathcal{N}(0, I)\}} \sum_{w=1}^v \|F(\theta + \sigma\epsilon_w) \epsilon_w\|_2^2 \\
&= \frac{1}{\sigma^2} \mathbb{E}_{\epsilon \sim \mathcal{N}(0, I)} \|F(\theta + \sigma\epsilon) \epsilon\|_2^2 = \frac{1}{\sigma^2} \mathbb{E}_{\epsilon \sim \mathcal{N}(0, I)} F(\theta + \sigma\epsilon)^2 \|\epsilon\|_2^2 \\
&\leq \frac{1}{\sigma^2} \mathbb{E}_{\epsilon \sim \mathcal{N}(0, I)} K^2 M^2 \|\epsilon\|_2^2 = \frac{K^2 M^2}{\sigma^2} \mathbb{E}_{\epsilon \sim \mathcal{N}(0, I)} \|\epsilon\|_2^2 = \frac{K^2 M^2 l}{\sigma^2}
\end{aligned}$$

□

*Proof of Theorem 1.* Hereafter we assume that  $\mathcal{F}_{\tau,D,D_b}$  holds for random iterates  $\theta^{(0)}, \dots, \theta^{(\tau)}$ . According to Lemma 3,  $\frac{\mathcal{C}\sqrt{l}}{\sigma}$  is a bound on  $F_\sigma(\theta)$ 's Hessian on  $\{\theta \in \mathbb{D} \mid \|\mathbf{N}\|_2, \|\mathbf{Q}\|_2 < D, \mathbf{b} < D_b\}$ . We apply [6, Appendix] to derive that for any  $\tau' \leq \tau$

$$F(\theta^{(\tau')}) - F(\theta^{(\tau'-1)}) \geq \alpha_{\tau'} \nabla_{\mathcal{R}} F_\sigma(\theta^{(\tau'-1)})^\top \tilde{\nabla}_{\mathcal{R}} F_\sigma(\theta^{(\tau'-1)}) - \frac{\mathcal{C}\sqrt{l}}{2\sigma} \alpha_{\tau'}^2 \|\tilde{\nabla}_{\mathcal{R}} F_\sigma(\theta^{(\tau'-1)})\|_F^2 \quad (23)$$

Let  $\mathcal{A}$  denote a sigma-algebra associated with  $\theta^{(1)}, \dots, \theta^{(\tau'-1)}$ . We use that  $\mathbb{E}[\tilde{\nabla}_{\mathcal{R}} F_\sigma(\theta^{(\tau'-1)}) | \mathcal{A}] = \nabla_{\mathcal{R}} F_\sigma(\theta^{(\tau'-1)})$  and  $\mathbb{E}[\|\tilde{\nabla}_{\mathcal{R}} F_\sigma(\theta^{(\tau'-1)})\|_2^2 | \mathcal{A}] \leq \frac{K^2 M^2 l}{\sigma^2}$  (Lemma 4) and take an expectation of (21) conditioned on  $\mathcal{A}$ :

$$\mathbb{E}[F(\theta^{(\tau')}) | \mathcal{A}] - F(\theta^{(\tau'-1)}) \geq \alpha_{\tau'} \|\nabla_{\mathcal{R}} F_\sigma(\theta^{(\tau'-1)})\|_2^2 - \frac{\mathcal{C}\sqrt{l}}{2\sigma} \alpha_{\tau'}^2 \cdot \frac{K^2 M^2 l}{\sigma^2}.$$

Regroup the last inequality and take a full expectation to obtain

$$\alpha_{\tau'} \mathbb{E} \|\nabla_{\mathcal{R}} F_\sigma(\theta^{(\tau'-1)})\|_2^2 \leq \mathbb{E} F(\theta^{(\tau')}) - \mathbb{E} F(\theta^{(\tau'-1)}) + \frac{\mathcal{C}\sqrt{l}}{2\sigma} \alpha_{\tau'}^2 \cdot \frac{K^2 M^2 l}{\sigma^2}.$$

Perform a summation of the last inequality for all  $\tau' \in \{1, \dots, \tau\}$ :

$$\begin{aligned} \sum_{\tau'=1}^{\tau} \alpha_{\tau'} \mathbb{E} \|\nabla_{\mathcal{R}} F_\sigma(\theta^{(\tau'-1)})\|_2^2 &\leq \mathbb{E} F(\theta^{(\tau)}) - F(\theta^{(0)}) + \frac{\mathcal{C}K^2 M^2 l^{\frac{3}{2}}}{2\sigma^3} \sum_{\tau'=1}^{\tau} \alpha_{\tau'}^2 \\ &\leq KM - F(\theta^{(0)}) + \frac{\mathcal{C}K^2 M^2 l^{\frac{3}{2}}}{2\sigma^3} \sum_{\tau'=1}^{\tau} \alpha_{\tau'}^2 \end{aligned}$$

since  $F(\theta) \leq KM$  for all  $\theta \in \mathbb{D}$ . We next observe that

$$\begin{aligned} \min_{0 \leq \tau' < \tau} \mathbb{E} \|\nabla_{\mathcal{R}} F_\sigma(\theta^{(\tau')})\|_2^2 &= \frac{\sum_{\tau'=1}^{\tau} \alpha_{\tau'} \min_{0 < \tau' \leq \tau} \mathbb{E} \|\nabla_{\mathcal{R}} F_\sigma(\theta^{(\tau'-1)})\|_2^2}{\sum_{\tau'=1}^{\tau} \alpha_{\tau'}} \\ &\leq \frac{1}{\sum_{\tau'=1}^{\tau} \alpha_{\tau'}} (KM - F(\theta^{(0)})) + \frac{\sum_{\tau'=1}^{\tau} \alpha_{\tau'}^2}{\sum_{\tau'=1}^{\tau} \alpha_{\tau'}} \cdot \frac{\mathcal{C}K^2 M^2 l^{\frac{3}{2}}}{2\sigma^3}. \end{aligned}$$

The proof is concluded by observing that  $\sum_{\tau'=1}^{\tau} \alpha_{\tau'} = \Omega(\tau^{0.5})$  and  $\sum_{\tau'=1}^{\tau} \alpha_{\tau'}^2 = O(\log \tau) = o(\tau^\epsilon)$  for any  $\epsilon > 0$ .

□
